# Supplementary material for: Emotional eating and adolescents body weight: the mediating role of dietary patterns in Taizhou, China
Source: Research Square preprint supplement (doi:10.21203/rs.3.rs-6468108/v1), 2025-05-08
Supplement: Supplementary file 1 [file 18ead4e7c603671ded8d6e62.docx]

**Supplementary information**

**Table 1** Food grouping used in dietary pattern analysis

| **Food Groups** | **Food Items** |
| --- | --- |
| Rice flour | Rice, buns, noodles, pancakes, bread |
| Livestock meat | Chicken and duck, pork, beef and lamb |
| Eggs | Eggs, duck eggs |
| Legumes | Soybean milk, soybean skin, tofu, dried beans |
| Aquatic products | Fish, shrimp, crab, squid |
| Dairy products | Plain milk, yogurt, cheese |
| Non-starchy vegetables | Spinach, Chinese cabbage, mini Chinese cabbage, beans, tomatoes, carrots |
| Root vegetables | Potatoes, lotus root |
| Bacteria and algae | Needle mushrooms, mushrooms and seaweed |
| Nuts | Melon seeds, badam, almonds, cashews |
| Rough food | Oats, maize, sweet potato |
| Fruit | Apples, oranges, pears, blueberries, dragon fruit |
| Snacks | Instant noodles, sweets, fried snacks |

**Table 2** Demographic information of participants (N = 862)

| **Item** | Number (%)/ mean ± Sd OR median (IQR) / range |
| --- | --- |
| **adolescent** |  |
| Sex |  |
| Boy | 482 (55.9) |
| Girl | 380 (44.1) |
| Grade level |  |
| Grade 7 | 462 (53.6) |
| Grade 8 | 400 (46.4) |
| Age (y) | 13.11 ± 0.70 |
| BMIZ | 0.32 ± 1.28 |
| WHtR | 0.42 (0.39, 0.47) |
| Residential |  |
| Yes | 220 (25.5) |
| No | 642 (74.5) |
| The only child |  |
| Yes | 134 (15.5) |
| No | 728 (84.5) |
| Place of residence |  |
| City | 450 (52.2) |
| Rural | 412 (47.8) |
| Type of family |  |
| Two-parent families | 707 (82.0) |
| Single parent families | 120 (13.9) |
| Reorganized families | 35 (4.1) |
| Living condition |  |
| Living with parents | 462 (53.6) |
| Living with parents and grandparents | 126 (14.6) |
| Living with relatives | 274 (31.8) |
| Number of exercises |  |
| < 3 | 514 (59.6) |
| ≥ 3 | 348 (40.4) |
| Exercise time |  |
| < 60 min | 796 (92.3) |
| ≥ 60 min | 66 (7.7) |
| Screen time (h) |  |
| < 2 | 432 (50.1) |
| ≥ 2 | 430 (49.9) |
| Sleep time (h) |  |
| < 8 | 180 (20.9) |
| ≥ 8 | 682 (79.1) |
| **Parents** |  |
| Monthly family income (CNY) |  |
| < 5,000 | 405 (47.0) |
| 5,000–9,999 | 341 (39.6) |
| ≥ 10,000 | 116 (13.4) |
| Education of the father |  |
| Primary school and below | 135 (15.7) |
| Lower secondary | 536 (62.2) |
| High School | 168 (19.5) |
| College and above | 23 (2.6) |
| Education of the mother |  |
| Primary school and below | 177 (20.5) |
| Lower secondary | 483 (56.0) |
| High School | 173 (20.1) |
| College and above | 29 (3.4) |

Note: BMIZ, body mass index Z score; WHtR, waist-to-height ratio; CNY, Chinese Yuan.

**Table 3** Influencing factors of BMIZ/WHtR (N = 862)

| **Item** | BMIZ | *t/F* | *p* | WHtR | *Z/H* | *p* |
| --- | --- | --- | --- | --- | --- | --- |
| **adolescent** |  |  |  |  |  |  |
| Sex |  | 1.808 | 0.071 |  | -0.955 | 0.339 |
| Boy | 0.39 ± 1.37 |  |  | 0.42 (0.39, 0.48) |  |  |
| Girl | 0.24 ± 1.14 |  |  | 0.42 (0.40, 0.47) |  |  |
| Grade level |  | 0.042 | 0.967 |  | -0.091 | 0.928 |
| Grade 7 | 0.33 ± 1.29 |  |  | 0.42 (0.39, 0.48) |  |  |
| Grade 8 | 0.32 ± 1.27 |  |  | 0.42 (0.40, 0.47) |  |  |
| Age (y) |  | 5.449 | 0.004 |  | 9.970 | 0.007 |
| 12 | 0.61 ± 1.40 |  |  | 0.44 (0.40, 0.50) |  |  |
| 13 | 0.28 ± 1.28 |  |  | 0.42 (0.39, 0.47) |  |  |
| 14 | 0.22 ± 1.17 |  |  | 0.42 (0.39, 0.46) |  |  |
| Residential |  | 0.908 | 0.364 |  | -0.390 | 0.697 |
| Yes | 0.39 ± 1.24 |  |  | 0.42 (0.40, 0.47) |  |  |
| No | 0.30 ± 1.29 |  |  | 0.42 (0.39, 0.48) |  |  |
| The only child |  | 0.411 | 0.682 |  | -0.241 | 0.809 |
| Yes | 0.37 ± 1.46 |  |  | 0.42 (0.39–0.49) |  |  |
| No | 0.32 ± 1.24 |  |  | 0.42 (0.40–0.47) |  |  |
| Place of residence |  | 0.507 | 0.613 |  | -0.722 | 0.470 |
| City | 0.35 ± 1.26 |  |  | 0.42 (0.40–0.48) |  |  |
| Rural | 0.30 ± 1.30 |  |  | 0.42 (0.39–0.47) |  |  |
| Type of family |  | 2.998 | 0.050 |  | 2.393 | 0.302 |
| Two-parent families | 0.37 ± 1.28 |  |  | 0.42 (0.40, 0.48) |  |  |
| Single parent families | 0.14 ± 1.24 |  |  | 0.42 (0.39, 0.46) |  |  |
| Reorganized families | -0.01 ± 1.35 |  |  | 0.41 (0.39, 0.46) |  |  |
| Living condition |  | 1.132 | 0.323 |  | 3.82 | 0.148 |
| Living with parents | 0.26 ± 1.30 |  |  | 0.42 (0.39–0.47) |  |  |
| Living with parents and grandparents | 0.39 ± 1.23 |  |  | 0.43 (0.40, 0.47) |  |  |
| Living with relatives | 0.40 ± 1.26 |  |  | 0.43 (0.40, 0.48) |  |  |
| Number of exercises |  | 1.272 | 0.204 |  | -1.445 | 0.149 |
| <3 | 0.37 ± 1.25 |  |  | 0.42 (0.40, 0.48) |  |  |
| ≥3 | 0.26 ± 1.31 |  |  | 0.42 (0.39, 0.47) |  |  |
| Exercise time |  | 0.353 | 0.724 |  | -0.006 | 0.995 |
| <60 min | 0.33 ± 1.27 |  |  | 0.42 (0.39, 0.47) |  |  |
| ≥60 min | 0.27 ± 1.42 |  |  | 0.42 (0.40, 0.48) |  |  |
| Screen time (h) |  | -2.235 | 0.026 |  | -2.266 | 0.023 |
| <2 | 0.23 ± 1.24 |  |  | 0.42 (0.39–0.47) |  |  |
| ≥2 | 0.42 ± 1.30 |  |  | 0.43 (0.40–0.48) |  |  |
| Sleep time (h) |  | 0.879 | 0.380 |  | -0.921 | 0.357 |
| <8 | 0.39 ± 1.15 |  |  | 0.43 (0.40–0.48) |  |  |
| ≥8 | 0.31 ± 1.31 |  |  | 0.42 (0.39–0.47) |  |  |
| **Parents** |  |  |  |  |  |  |
| Monthly family income(CNY) |  | 0.997 | 0.369 |  | 1.114 | 0.573 |
| ＜5,000 | 0.26 ± 1.30 |  |  | 0.42 (0.39, 0.47) |  |  |
| 5,000–9,999 | 0.40 ± 1.20 |  |  | 0.43 (0.40, 0.48) |  |  |
| ≥10,000 | 0.33 ± 1.44 |  |  | 0.42 (0.39, 0.48) |  |  |
| Education of the father |  | 2.900 | 0.034 |  | 7.307 | 0.063 |
| Primary school and below | 0.46 ± 1.22 |  |  | 0.43 (0.40, 0.47) |  |  |
| Lower secondary | 0.31 ± 1.29 |  |  | 0.42 (0.39, 0.48) |  |  |
| High School | 0.35 ± 1.28 |  |  | 0.42 (0.40, 0.47) |  |  |
| College and above | -0.38 ± 1.12 |  |  | 0.40 (0.38, 0.43) |  |  |
| Education of the mother |  | 1.960 | 0.118 |  | 3.243 | 0.356 |
| Primary school and below | 0.39 ± 1.22 |  |  | 0.43 (0.40, 0.47) |  |  |
| Lower secondary | 0.33 ± 1.29 |  |  | 0.42 (0.39, 0.48) |  |  |
| High School | 0.34 ± 1.27 |  |  | 0.42 (0.39, 0.48) |  |  |
| College and above | -0.23 ± 1.45 |  |  | 0.40 (0.39, 0.46) |  |  |

Note: BMIZ, body mass index Z score; WHtR, waist-to-height ratio; CNY, Chinese Yuan.
